# Supplementary material for: Non-targeted metabolomics identified a common metabolic signature of lethal ventricular tachyarrhythmia (LVTA) in two rat models
Source: Royal Society of Chemistry journal article supplement (doi:10.1039/c6mb00080k), 2016-04-21
Supplement: c6mb00080k1.pdf [file c6mb00080k1.pdf]

## Supplemental Information

### Metabolic characteristics of lethal ventricular tachyarrhythmia (LVTA) by non-targeted metabolomics----A study from two LVTA rat models

Xingxing Wang<sup>1</sup>. Dian Wang<sup>1</sup>. Xiaojun Yu<sup>1</sup>. Guohong Zhang<sup>2</sup>. Jiayan Wu<sup>1</sup>. Guanghui Zhu<sup>1</sup>. Ruibing Su<sup>1</sup>. Junyao Lv<sup>1</sup>

<sup>1</sup> Department of Forensic Medicine, Shantou University Medical College, <sup>2</sup> Department of Pathology, Shantou University Medical College.

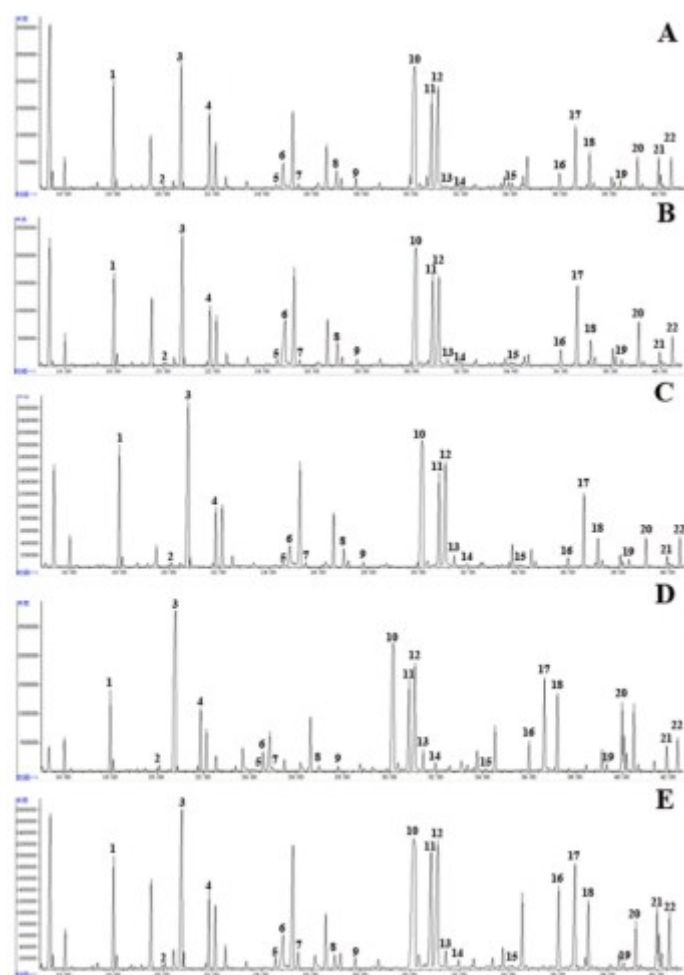

**Fig. S1** Protocols for metabolomic analysis of myocardium profiling using GC/MS. A: CAL-N; B: CAL-M; C: CAL-T; D: control group for ACO-LVTA-SCD; E: ACO-LVTA-SCD. Spectrum is different for each group (1: carbonate, 2: ethanolamine, 3: lactic acid, 4: alanine, 5: valine,

6: urea, 7: leucine, 8: succinic acid, 9: fumaric acid, 10: phosphoric acid, 11: proline, 12: creatinine, 13: serine, 14: threonine, 15: aspartic acid, 16: hypoxanthine, 17: glutamic acid, 18: hexadecanoic acid, 19: lysine, 20: glutamine, 21: linoleic acid, 22: stearic acid)

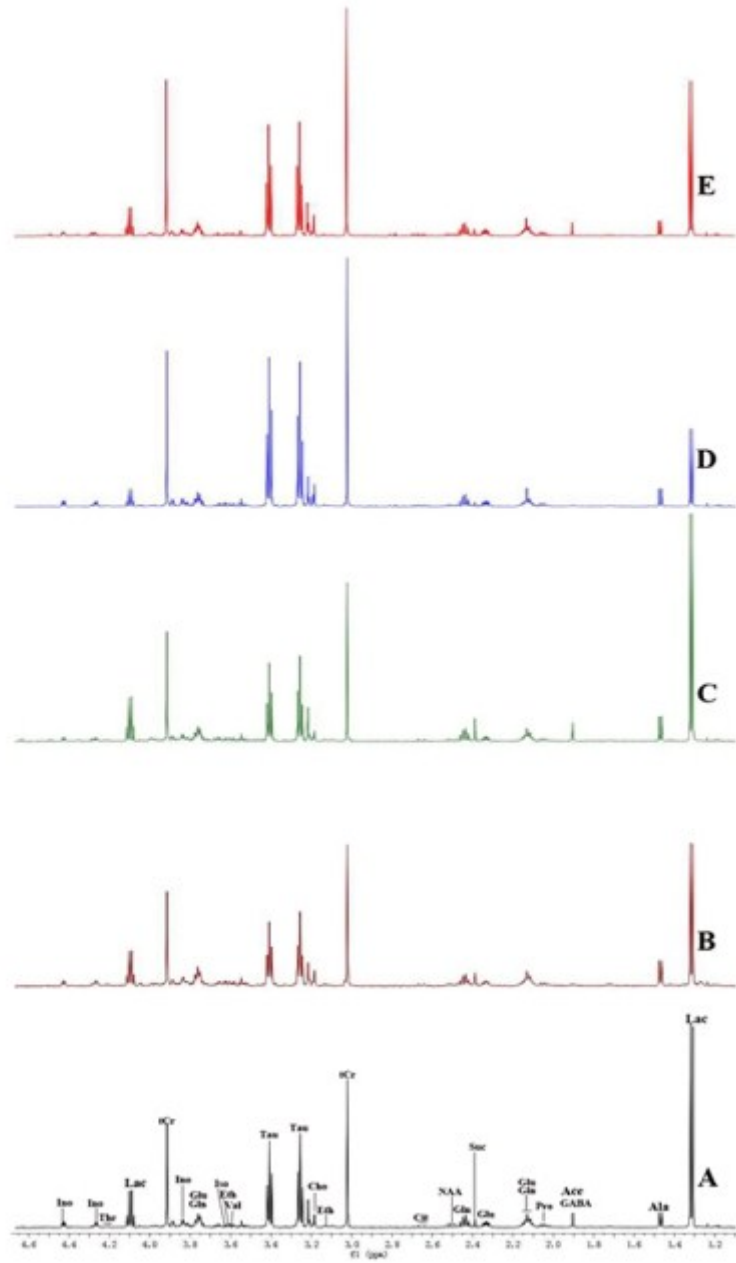

**Fig. S2** Protocols for metabolomic analysis of myocardium profiling using <sup>1</sup>H-NMR (Bruker BioSpin, 600MHz, noesygppr1d sequence). A: CAL-N; B: CAL-M; C: CAL-T; D: control group for ACO-LVTA-SCD; E: ACO-LVTA-SCD. Each group shows characteristic differences.

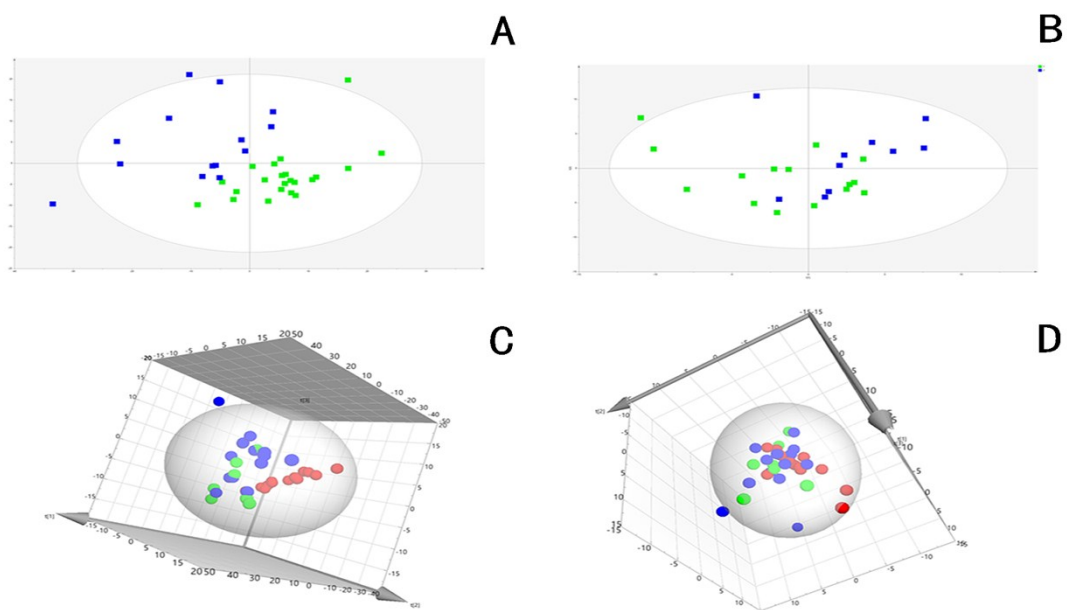

**Fig.S3** PCA mode: Two-component plot in ACO-LVTA and its control (green=aconitine, blue=control) from GC-MS (A) and 1H-NMR (B) metabolic profiles; Three-component plot in three CAL-LVTA groups (blue=CAL-T, red=CAL-M, green=CAL-N) from GC-MS (C) and 1H-NMR (D). The cumulative R2Y and Q2 in aconitine-treated model were 0.746 and 0.541, and 0.608 and 0.250 in GC-MS and 1H-NMR modes, respectively. The cumulative R2Y and Q2 in CAL-treated model were 0.899 and 0.746, and 0.641 and 0.10 in GC-MS and 1H-NMR modes, respectively

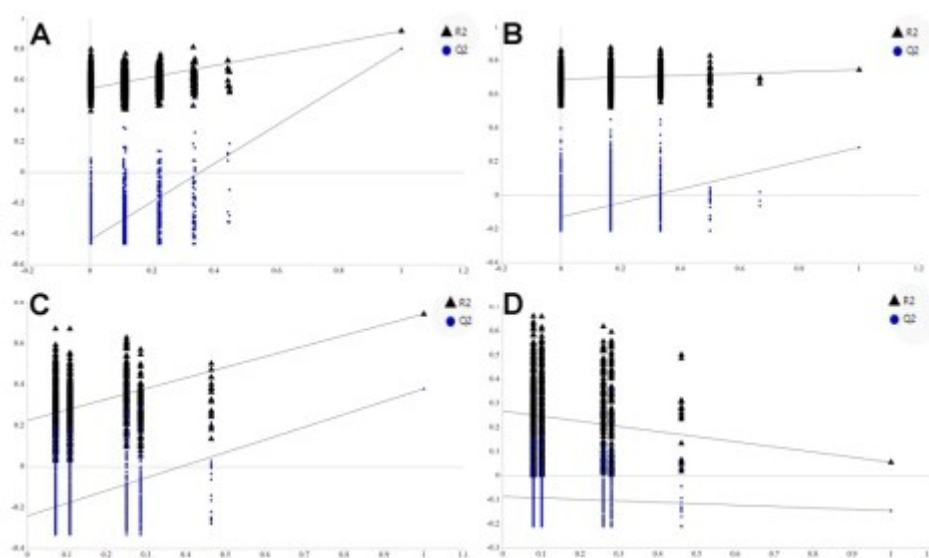

**Fig. S4** Validation plots of responses: GC/MS results of (a) ACO-LVTA vs. control, and (b) CAL-N vs. CAL-T; 1H-NMR results of (c) ACO-LVTA vs. its control group and (d) CAL-N vs. CAL-T. The



|       |    |     |     |   |      |       |     |     |     |   |      |
|-------|----|-----|-----|---|------|-------|-----|-----|-----|---|------|
| Contr | 0  | 0   | 0   | 0 | CI   | CAL-N | 0   | 0   | 0   | 2 | HF   |
| Contr | 0  | 0   | 0   | 0 | CI   | CAL-N | 0   | 0   | 0   | 2 | HF   |
| Contr | 0  | 0   | 0   | 0 | CI   | CAL-N | 0   | 0   | 0   | 2 | HF   |
| Contr | 0  | 0   | 0   | 0 | CI   | CAL-N | 0   | 0   | 0   | 2 | HF   |
| Contr | 0  | 0   | 0   | 0 | CI   | CAL-N | 0   | 0   | 0   | 2 | HF   |
| Contr | 0  | 0   | 0   | 0 | CI   | CAL-T | 121 | 150 | 271 | 6 | LVTA |
| Contr | 0  | 0   | 0   | 0 | CI   | CAL-T | 135 | 164 | 299 | 6 | LVTA |
| Contr | 0  | 0   | 0   | 0 | CI   | CAL-T | 64  | 23  | 87  | 5 | LVTA |
| Contr | 0  | 0   | 0   | 0 | CI   | CAL-T | 36  | 240 | 276 | 6 | LVTA |
| Contr | 0  | 0   | 0   | 0 | CI   | CAL-T | 210 | 11  | 221 | 6 | LVTA |
| Contr | 0  | 0   | 0   | 0 | CI   | CAL-T | 74  | 254 | 328 | 7 | LVTA |
| Contr | 0  | 0   | 0   | 0 | CI   | CAL-T | 6   | 440 | 446 | 7 | LVTA |
| ACO   | 28 | 107 | 135 | 5 | LVTA | CAL-T | 0   | 236 | 236 | 6 | LVTA |
| ACO   | 25 | 97  | 122 | 5 | LVTA | CAL-T | 103 | 83  | 186 | 6 | LVTA |
| ACO   | 43 | 96  | 139 | 5 | LVTA | CAL-T | 48  | 27  | 75  | 5 | LVTA |
| ACO   | 9  | 126 | 135 | 5 | LVTA | CAL-T | 46  | 59  | 105 | 5 | LVTA |
| ACO   | 36 | 112 | 148 | 5 | LVTA | CAL-T | 12  | 269 | 281 | 6 | LVTA |
| ACO   | 6  | 101 | 107 | 5 | LVTA | CAL-T | 15  | 160 | 175 | 6 | LVTA |
| ACO   | 38 | 50  | 88  | 5 | LVTA | CAL-T | 5   | 216 | 221 | 6 | LVTA |
| ACO   | 22 | 112 | 134 | 5 | LVTA | CAL-N | 77  | 100 | 177 | 6 | HF   |
| ACO   | 16 | 117 | 133 | 5 | LVTA | CAL-N | 2   | 30  | 32  | 4 | HF   |
| ACO   | 42 | 104 | 146 | 5 | LVTA | CAL-N | 0   | 10  | 10  | 3 | HF   |
| ACO   | 5  | 110 | 115 | 5 | LVTA | CAL-N | 6   | 95  | 101 | 5 | HF   |
| ACO   | 10 | 82  | 92  | 5 | LVTA | CAL-N | 67  | 0   | 67  | 4 | HF   |
| ACO   | 29 | 174 | 203 | 6 | LVTA | CAL-N | 44  | 27  | 71  | 4 | HF   |
| ACO   | 6  | 150 | 156 | 5 | LVTA | CAL-N | 46  | 0   | 46  | 4 | HF   |
| ACO   | 61 | 102 | 163 | 6 | LVTA | CAL-N | 58  | 115 | 173 | 6 | HF   |
| ACO   | 32 | 100 | 132 | 5 | LVTA | CAL-N | 3   | 0   | 3   | 3 | HF   |
| ACO   | 36 | 87  | 123 | 5 | LVTA | CAL-N | 13  | 0   | 13  | 3 | HF   |
| ACO   | 54 | 159 | 213 | 6 | LVTA | CAL-N | 107 | 0   | 107 | 5 | HF   |
| ACO   | 9  | 77  | 86  | 5 | LVTA | CAL-N | 206 | 72  | 278 | 6 | HF   |
| ACO   | 12 | 109 | 121 | 5 | LVTA | CAL-N | 9   | 99  | 108 | 5 | HF   |
| ACO   | 12 | 103 | 115 | 5 | LVTA | CAL-N | 8   | 3   | 11  | 3 | HF   |
| ACO   | 14 | 100 | 114 | 5 | LVTA | CAL-N | 34  | 39  | 73  | 4 | HF   |
| ACO   | 51 | 92  | 143 | 5 | LVTA |       |     |     |     |   |      |

---

Group: ACO, LVTA-SCD induced by aconitine; Contr, Control of LVTA-SCD over-anesthetizing to death. CAL-T, CAL-M, CAL-N are defined the same as the method section. VT, VF,TV+VF stand for the duration (second) of them. Score represents arrhythmia scoring of experimental rats calculated by the Lambeth Conventions. C of D is the abbreviation of “cause of death”. CI, central inhibition; LVTA, lethal ventricular tachyarrhythmia; HF, heart failure.

## SUPPLEMENTARY EXPERIMENTAL PROCEDURES

## Chemicals

Methanol, acetonitrile, and dichloromethane, pyridine were purchased from Fisher Scientific. Pentobarbital sodium, methoxiamine hydrochloride, D-norleucine (internal standard, IS) and trimethylsilylpropionate (TSP) were purchased from Norell. N-methyl-N-(t-butyl-dimethylsilyl)-trifluoroacetamide (MtBSTFA), trimethyl-chlorosilane (TMCS) were purchased from Regis. Deuterioxide was purchased from Sigma-Aldrich. Aconitine was purchased from Nanjing Guangrun Biotech Co. Ltd., China).

## Metabolic profiling by GC-MS

Sample preparation: 30 mg of myocardium (the sampling sequence was random, the same for <sup>1</sup>H-NMR) was homogenized and extracted with 900  $\mu$ L of methanol/chloroform (3:1) for seven minutes. After storage at -20 $^{\circ}$ C for 10 min, the extract was centrifuged at 12 000 g for 10min at 4 $^{\circ}$ C. 200  $\mu$ L of supernatant was transferred to a GC vial and spiked with an internal standard of D-norleucine (20  $\mu$ L, 0.5 $\mu$ mol/ml), mixed well and dried under pure nitrogen blowing in a mild flow velocity at 70 $^{\circ}$ C. Then 20 $\mu$ L of methylene chloride was added, and samples were dried again under pure nitrogen to ensure that the samples were completely dry. This dried aliquot was subjected to oximation and derivatization procedures with 30  $\mu$ L methoxiamine (15mg/ml in pyridine) for 16 h at 20 $^{\circ}$ C, followed by 30 $\mu$ L of MTBSFA (1%TMCS) for 1 h at 20 $^{\circ}$ C. A 1  $\mu$ L aliquot of the derivatized solution was separated for GC-MS analysis.

Metabolic profiling was analyzed by a GC-TOF MS system consisting of an Agilent 6890N GC system, connected to an Agilent 5975c single quadrupole MSD. A DB-5MS capillary column (30 m $\times$ 250  $\mu$ m $\times$ 0.25  $\mu$ m film thickness; 5% diphenyl cross-linked 95% dimethylpolysiloxane) (Agilent Technologies, USA) was used for the separation of metabolites. One  $\mu$ L of derivatized sample was injected in splitless mode. High purity helium (99.9996%) was used for the carrier gas at a constant flow rate of 1mL/min. The GC oven temperature was programmed with an initial temperature at 60  $^{\circ}$ C for 2 min, and then increased lastly to 285  $^{\circ}$ C at 5  $^{\circ}$ C/min and maintained for 2 min. The temperature of the injection port, the transfer interface and the EI source were set to 230, 290 and 230  $^{\circ}$ C, respectively. The selected mass range was set to 50–600 m/z with electron impact ionization (70 eV), and the

selected scan speed was 0.99 scans per second.

### **Metabolic profiling by <sup>1</sup>H NMR**

Sample Preparation: 30 mg of myocardium was disrupted in 0.6 M ice-cold perchloric acid (30 ml/g) by an automated homogenizer for exactly 5 min. After the mixture was vortexed for 30 s and centrifuged for 20 minutes (12,000 rpm) at 4°C in succession, 800 μL of supernatant was collected, and neutralized with ice-cold potassium hydroxide (pH=7), and incubated on ice for 20 min to lower the solubility of chlorate. Then 900 μL of supernatant from each sample was collected, frozen at -80°C, and lyophilized in a Moduloyd freeze dryer (Thermo Electron Company, USA) for 16 h to avoid the appearance of a dominant water signal in the <sup>1</sup>H-NMR spectra. The dry powder was dissolved in 550 μL of D<sub>2</sub>O with sodium phosphate buffer (pH=7) to minimize variation in sample pH and permit deuterium locking, including the internal standard of deuterated TSP at a known concentration. The resulting sample was vortexed and centrifuged again. Finally, 500 μL aliquots of supernatant were transferred to a 5 mm NMR tube (Wilmad, America) for analysis.

<sup>1</sup>H-NMR spectra of heart samples were obtained at 600.13 MHz (Bruker Biospin GmbH, Rheinstetten, Germany, Europe) at 298 K using a NOESYPRID spectrum with water suppression. NOESYPRID spectrum were obtained using the pulse sequence [D1-90°-t-90°-t-90°-ACQ] with a relaxation delay of 4.0 s, a spectral width of 12335.5 Hz, and 32 scans collected into 16 k data points. As with standard 1D spectrum, all data sets were zero-filled to 16 k data points and multiplied by an exponential window function with a line broadening apodization factor of 0.3 Hz prior to Fourier transformation. <sup>1</sup>H-NMR spectra were manually phased and baseline corrected and chemical shifts were referenced to TSP (0.0 ppm) using the MestReNova software (version 6.1.0, Mnova). The residual water resonance signal ( $\delta$  4.6-5.2) was excluded before analysis. Spectra were “binned” into 0.01 ppm regions over the range of 0.5-8.2 ppm, and then the data matrices covering overall metabolic information were produced in an Excel format, followed by a multivariate analysis.

The normalization of integral values in each spectrum was performed by using a constant sum of all integrals in a spectrum before statistical analyses. Metabolites in the spectra were identified by matching with information in relevant literature and comparison to public databases, such as the

BioMagResBank Database (BMRB, [www.bmrwisc.edu](http://www.bmrwisc.edu)) and the Human Metabolome Database (HMDB, [www.hmdb.ca](http://www.hmdb.ca)).

The relative contents of metabolites were calculated with the following formula according to reference:  $C_m = T_{Im} / T_{I_{TSP}} \times N_p / 9 \times C_{TSP}$ , where  $T_{Im}$  and  $T_{I_{TSP}}$  stand for the total integrals of metabolite and TSP, respectively.  $N_p$  and 9 represent for the number of protons of the metabolite and TSP, respectively.  $C_m$  and  $C_{TSP}$  stand for the concentrations of metabolites and TSP, respectively.
